# Supplementary material for: A T cell-intrinsic function for NF-κB RelB in experimental autoimmune encephalomyelitis
Source: PubMed Central journal article supplement (PMC8490410; doi:10.1038/s41598-021-99134-x), 2021-10-04
Supplement: 41598_2021_99134_MOESM1_ESM.pdf [file 41598_2021_99134_MOESM1_ESM.pdf]

## **A T cell-intrinsic function for NF- $\kappa$ B RelB in experimental autoimmune encephalomyelitis**

Guilhem Lalle<sup>1</sup>, Raphaëlle Lautreite<sup>1</sup>, Allison Voisin<sup>1</sup>, Julie Twardowski<sup>1</sup>, Pierre Stéphan<sup>1</sup>, Marlène Perrin-Niquet<sup>1</sup>, Ramdane Igalouzène<sup>1</sup>, Saidi Soudja<sup>1</sup>, Julien C. Marie<sup>1</sup>, Marc Vocanson<sup>2</sup>, Nilushi De Silva<sup>3</sup>, Ulf Klein<sup>4</sup>, Sankar Ghosh<sup>5</sup> and Yenkel Grinberg-Bleyer<sup>1,\*</sup>

<sup>1</sup> Cancer Research Center of Lyon, UMR INSERM 1052, CNRS 5286, Université Claude Bernard Lyon 1, Labex DEVweCAN, Centre Léon Bérard, Lyon, France.

<sup>2</sup> CIRI-Centre International de Recherche en Infectiologie ; INSERM, U1111, Université Claude Bernard Lyon 1, Ecole Normale Supérieure de Lyon, CNRS UMR 5308, Lyon, France.

<sup>3</sup> Immunity and Cancer Department, Institut Curie, Paris-Sciences-et-Lettres Research University, INSERM U932, Paris, France

<sup>4</sup> Division of Haematology & Immunology, Leeds Institute of Medical Research at St. James's, University of Leeds, Leeds, UK.

<sup>5</sup> Department of Microbiology & Immunology, College of Physicians & Surgeons, Columbia University, New York, NY 10032, USA.

\* Lead contact: [Yenkel.grinberg-bleyer@inserm.fr](mailto:Yenkel.grinberg-bleyer@inserm.fr)

| Reagent or resource                                   | Source                   | Identifier   |
|-------------------------------------------------------|--------------------------|--------------|
| Purified Anti-Mouse CD16 / CD32(2.4G2)                | Tonbo Biosciences        | 70-0161-U500 |
| BUV805 Rat Anti-Mouse CD4 (GK1.5)                     | BD Biosciences           | 612900       |
| APC-eFluor 780 anti-mouse CD4 (GK1.5)                 | Thermo Fisher Scientific | 47-0041-82   |
| Alexa Fluor 532 anti-mouse CD8 alpha (53-6.7)         | Thermo Fisher Scientific | 58-0081-80   |
| Brilliant violet 570 anti-mouse CD8 alpha (53-6.7)    | BioLegend                | 100739       |
| Alexa Fluor 700 anti-mouse CD25 (PC61)                | BioLegend                | 102024       |
| APC-R700 anti-mouse CD25 (PC61)                       | BD Biosciences           | 565134       |
| BUV496 Rat Anti-Mouse CD44 (IM7)                      | BD Biosciences           | 741057       |
| BUV395 Rat Anti-Mouse CD45 (30-F11)                   | BD Biosciences           | 564279       |
| FITC anti mouse CD45 (30-F11)                         | Thermo Fisher Scientific | 11-0451-85   |
| Biotin anti-mouse CD45 (30-F11)                       | BioLegend                | 103103       |
| PE anti-mouse CD45.2 (104)                            | BD Biosciences           | 560695       |
| Biotin anti-mouse CD45.1 (A20)                        | BioLegend                | 110704       |
| Brilliant violet BV510 anti-mouse CD62L (MEL-14)      | BioLegend                | B259984      |
| Alexa Fluor 700 anti-mouse CD103 (2E7)                | BioLegend                | 121441       |
| BUV661 anti-mouseCD183 (CXCR3) (CXCR3-173)            | BD Biosciences           | 741681       |
| APC anti-mouse CD196 (CCR6) (22-9L17)                 | BioLegend                | 129814       |
| Brilliant Violet 785 anti-mouse TCR $\beta$ (H57-597) | BioLegend                | 109249       |
| PerCP/Cyanine5.5 anti-mouse TCR $\beta$ (H57-597)     | BD Biosciences           | 560657       |
| APC anti-mouse FoxP3 (FJK-16s)                        | Thermo Fisher Scientific | 17-5773-82   |
| eFluor 450 anti-mouse FOXP3 (FJK-16s)                 | Thermo Fisher Scientific | 48-5773-82   |
| PE anti-mouse/human ROR gamma (t) (AFKJS-9)           | Thermo Fisher Scientific | 12-6988-82   |
| Pe-Cyanine 7 anti mouse T-bet (4B10)                  | Thermo Fisher Scientific | 25-5825-82   |
| PE anti-mouse/human T-bet (4B10)                      | BioLegend                | 644809       |
| Brilliant violet 711 anti-GATA3 (L50-823)             | BD Biosciences           | 565449       |
| PerCP/Cyanine5.5 anti-mouse Ki67 (16A8)               | BioLegend                | 652423       |
| Brilliant violet 711 anti-mouse IL-17a (TC11-18H10.1) | BioLegend                | 506941       |
| Brilliant violet 421 anti-mouse IFN $\gamma$ (XMG1.2) | BioLegend                | 505830       |
| Alexa Fluor 700 anti-mouse IFN $\gamma$ (XMG1.2)      | BD Biosciences           | 557998       |
| PE-Cyanine 7 anti-mouse IFN $\gamma$ (XMG1.2)         | Thermo Fisher Scientific | 25-7311-82   |
| APC/Fire 750 anti-mouse GM-CSF (MP1-22E9)             | BioLegend                | 505424       |
| APC anti-mouse GM-CSF (MP1-22E9)                      | Thermo Fisher Scientific | 17-7331-82   |
| Brilliant violet 510 anti-mouse IL-17a (TC11-18H10)   | BioLegend                | 564168       |
| Biotin anti-mouse TNF alpha (MP6-XT22)                | BioLegend                | 506311       |
| eFluor 450 anti-mouse TNF alpha (MP6-XT22)            | Thermo Fisher Scientific | 48-7321-82   |
| PE anti-mouse IL-2 (JES6-5H4)                         | Thermo Fisher Scientific | 12-7021-82   |
| Brilliant violet 711 anti mouse IL-2 (JES6-5H4)       | BioLegend                | 503837       |
| Zombie UV Fixable Viability Kit                       | BioLegend                | 423107       |
| Zombie Green Fixable Viability Kit                    | BioLegend                | 423111       |
| LIVE/DEAD Fixable Aqua Dead Cell Stain Kit            | Thermo Fisher Scientific | L34957       |
| Brilliant Violet 650 Streptavidin                     | BioLegend                | 405231       |
| PE Streptavidin                                       | BioLegend                | B291758      |
| CellTrace Violet Cell Proliferation Kit               | Thermo Fisher Scientific | C34557       |

**Supplementary Table 1.** FACS Abs and labels used in this study
